# Supplementary material
Source: MDPI journal article supplement (https://www.mdpi.com/2073-4395/13/3/824)
Supplement: s1 [file s1]

Supplementary table S1. Communalities (correlations between original variables and PCs) from principal component analysis

|                       | PC1   | PC2   | PC3   |
|-----------------------|-------|-------|-------|
| pH (H <sub>2</sub> O) | -0.68 | -0.68 | -0.05 |
| DOC                   | 0.05  | 0.76  | 0.39  |
| LOI                   | -0.73 | 0.47  | 0.38  |
| Tot. C                | -0.79 | 0.17  | 0.52  |
| LOI/TC                | 0.51  | 0.26  | -0.45 |
| Tot. N                | -0.68 | 0.52  | 0.41  |
| Na                    | -0.56 | -0.22 | 0.09  |
| K                     | -0.63 | -0.27 | -0.18 |
| Ca                    | -0.86 | -0.41 | 0.14  |
| Mg                    | -0.43 | -0.39 | -0.33 |
| CEC                   | -0.87 | -0.37 | 0.18  |
| Cr <sub>H2O</sub>     | 0.02  | 0.62  | -0.61 |
| Fe <sub>H2O</sub>     | 0.54  | 0.69  | 0.06  |
| Ni <sub>H2O</sub>     | -0.19 | 0.71  | -0.46 |
| Cd <sub>H2O</sub>     | 0.43  | 0.65  | 0.26  |
| Zn <sub>H2O</sub>     | 0.39  | 0.71  | 0.28  |
| Se <sub>H2O</sub>     | -0.73 | 0.31  | 0.17  |
| Cr <sub>Tot</sub>     | -0.55 | 0.38  | -0.64 |
| Fe <sub>Tot</sub>     | -0.72 | 0.27  | -0.49 |
| Ni <sub>Tot</sub>     | -0.71 | 0.33  | -0.53 |
| Zn <sub>Tot</sub>     | -0.65 | 0.51  | -0.14 |
| Cd <sub>Tot</sub>     | -0.50 | 0.46  | 0.24  |
| Se <sub>Tot</sub>     | -0.74 | 0.42  | 0.06  |

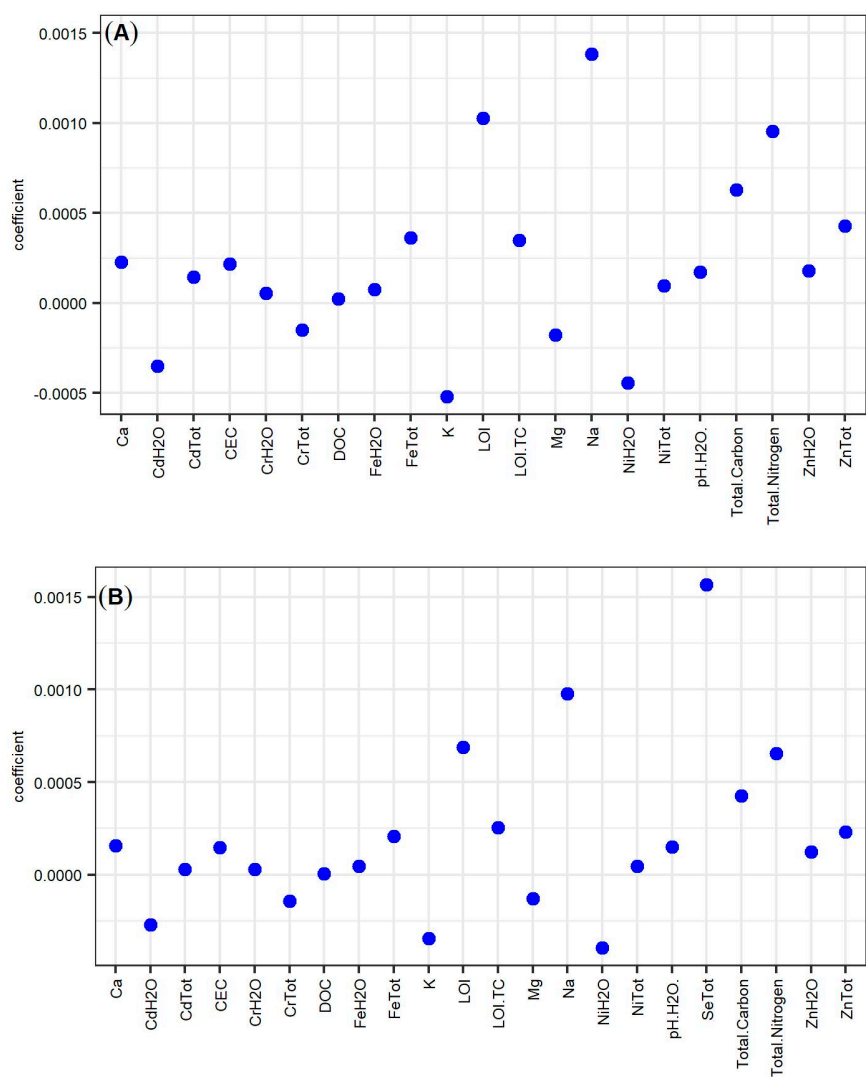

Supplementary figure S1. Coefficients of calibrated PLS models A and B from figure 6 in the main text.
